# Supplementary material
Source: PubMed Central journal article supplement (PMC3151732)

**Supplementary Figure 1.** Grand averaged waveforms to cloze-matched complement NPs in all three sentence types. Voltage maps comparing ERPs evoked by the complement noun between 300-500 ms – the N400 effect (left) and between 600-900 ms – the P600 effect (right).

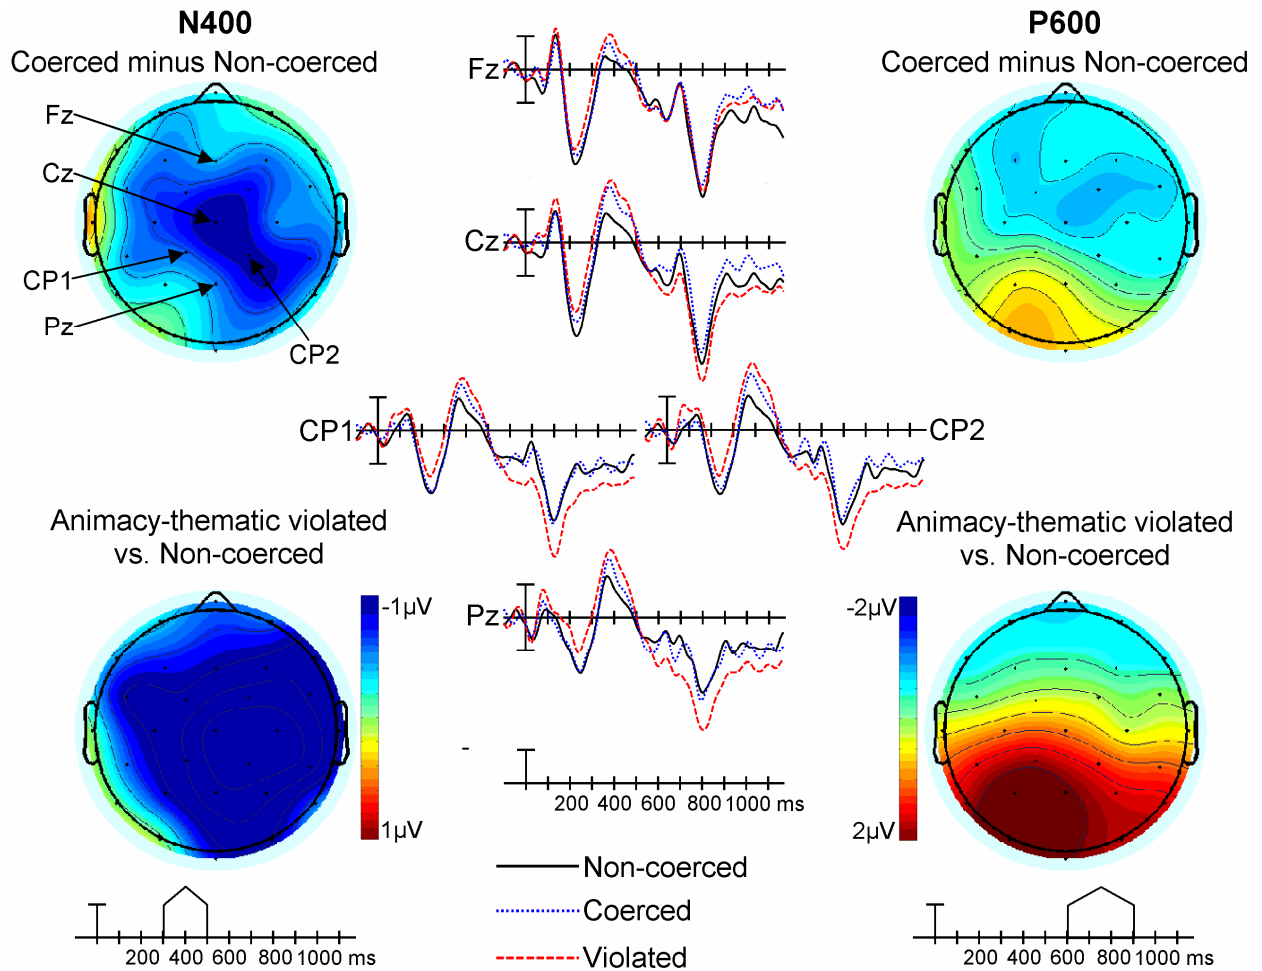

Supplement: NIHMS309757-supplement-Supplementary_Figure.pdf [file NIHMS309757-supplement-Supplementary_Figure.pdf]
